# Supplementary material
Source: Elsevier journal article supplement (https://www.sciencedirect.com/science/article/pii/S0021755721000693)
Supplement: mmc1 [file S0021755721000693:mmc1.docx]

JPED-D-20-00279 – Supplementary Material

**Supplementary material - Portuguese version of the scale.**

| **Escala Comportamental - Saúde Familiar** | |
| --- | --- |
| Classifique com que frequência seu/sua filho (a) apresenta os seguintes comportamentos de saúde que vai de 0 (Quase nunca) a 4 (Quase sempre). Caso algum item não se aplique a seu/sua filho (a) por conta de sua idade, indique "0". | |
|
|
| **Meu/minha filho(a)...** | Classifique com que frequência ele(a) exibe os seguintes comportamentos. |
| **0 = Quase nunca** |
| **1 = Raramente** |
| **2 = Às vezes** |
| **3 = Frequentemente** |
| **4 = Quase Sempre** |
| 1. ...toma café da manhã diariamente | 0 1 2 3 4 |
| 2. …pratica algum esporte (natação, futebol, ginástica, dança, etc.) | 0 1 2 3 4 |
| 3. ...prefere realizar atividades (brincar) em ambientes fechados do que realizar atividades ao ar livre (na rua) | 0 1 2 3 4 |
| 4. …recebe ajuda para escolher alimentos saudáveis | 0 1 2 3 4 |
| 5. …se alimenta frequentemente durante o dia | 0 1 2 3 4 |
| 6. … faz atividades físicas junto com os pais/cuidadores | 0 1 2 3 4 |
| 7. … frequentemente pede lanches que não são saudáveis | 0 1 2 3 4 |
| 8. …é fisicamente ativo (a) por pelo menos 30 minutos contínuos todos os dias | 0 1 2 3 4 |
| 9. …come as refeições à mesa | 0 1 2 3 4 |
| 10. … recebe alimentos não saudáveis de outros familiares | 0 1 2 3 4 |
| 11. …faz atividades (brinca) ao ar livre. | 0 1 2 3 4 |
| 12. …segue uma rotina alimentar | 0 1 2 3 4 |
| 13. …fica sentado à mesa | 0 1 2 3 4 |
| 14. …esconde alimentos | 0 1 2 3 4 |
| 15. …faz no mínimo três refeições por dia | 0 1 2 3 4 |
| 16. …come quando se sente entediado (a), triste, bravo(a) ou nervoso(a) | 0 1 2 3 4 |
| 17. …é influenciado (a) por outras crianças a comer alimentos não saudáveis | 0 1 2 3 4 |
|  |  |

| Classifique com que frequência você apresenta os seguintes comportamentos de saúde envolvendo a frequência adequada, que vai de 0 (quase nunca) a 4 (quase sempre). Caso algum item não se aplique a você, indique "0". | |
| --- | --- |
|
|  | Classifique com que frequência você desempenha cada um dos seguintes comportamentos. |
|  | 0 = Quase nunca |
| **Eu...** | 1 = Raramente |
|  | 2 = Às vezes |
|  | 3 = Frequentemente |
|  | 4 = Quase sempre |
| 18. ...preparo alimentos com baixo teor de calorias e gordura quando cozinho para minha família | 0 1 2 3 4 |
| 19. ...ofereço a meu/minha filho (a) uma alternativa saudável quando ele (a) pede alimentos não saudáveis | 0 1 2 3 4 |
| 20. ...como alimentos com baixo teor de calorias e gorduras | 0 1 2 3 4 |
| 21. …mantenho alimentos não saudáveis longe da vista de meu/minha filho (a) | 0 1 2 3 4 |
| 22. ...escolho opções saudáveis de baixa caloria em “fast food” ou em restaurantes | 0 1 2 3 4 |
| 23. …como frutas, legumes e verduras | 0 1 2 3 4 |
| 24. … faço exercícios físicos ou realizo algum tipo de atividade física | 0 1 2 3 4 |
| 25. …sirvo frutas e verduras frescas | 0 1 2 3 4 |
| 26. …ensino meu/minha filho (a) sobre opções saudáveis de alimentos | 0 1 2 3 4 |
| 27. …faço atividades físicas junto com meu/minha filho (a) | 0 1 2 3 4 |
